# Supplementary material
Source: HighWire-hosted journal article supplement (http://www.cmaj.ca/highwire/filestream/79029/field_highwire_adjunct_files/0/202756-res-1-at.pdf)
Supplement: 202756-res-1-at.pdf [file 202756-res-1-at.pdf]

## Appendix 1: 13 Care Services Available to Residents (Directly or Indirectly)

| Services                         |
|----------------------------------|
| Assistance with personal hygiene |
| Assistance with bathing          |
| Assistance with dressing         |
| Assistance with ambulation       |
| Assistance with feeding          |
| Meal provision                   |
| Medication administration        |
| Dementia care program            |
| Continence care                  |
| Skin and wound care program      |
| Nursing services*                |
| Medical services^                |
| Pharmacy services~               |

\*Any service that a member of the College of Nurses of Ontario provides while engaging in the practice of nursing.

^Any service that a member of the College of Physicians and Surgeons of Ontario provides while engaging in the practice of medicine.

~Any service that a member of the Ontario College of Pharmacists provides while engaging in the practice of pharmacy.
